# Supplementary material for: Transcriptome Profiles Associated to VHSV Infection or DNA Vaccination in Turbot (Scophthalmus maximus)
Source: PubMed Central journal article supplement (PMC4123995; doi:10.1371/journal.pone.0104509), 2014-08-06

# pMVCV 1.4

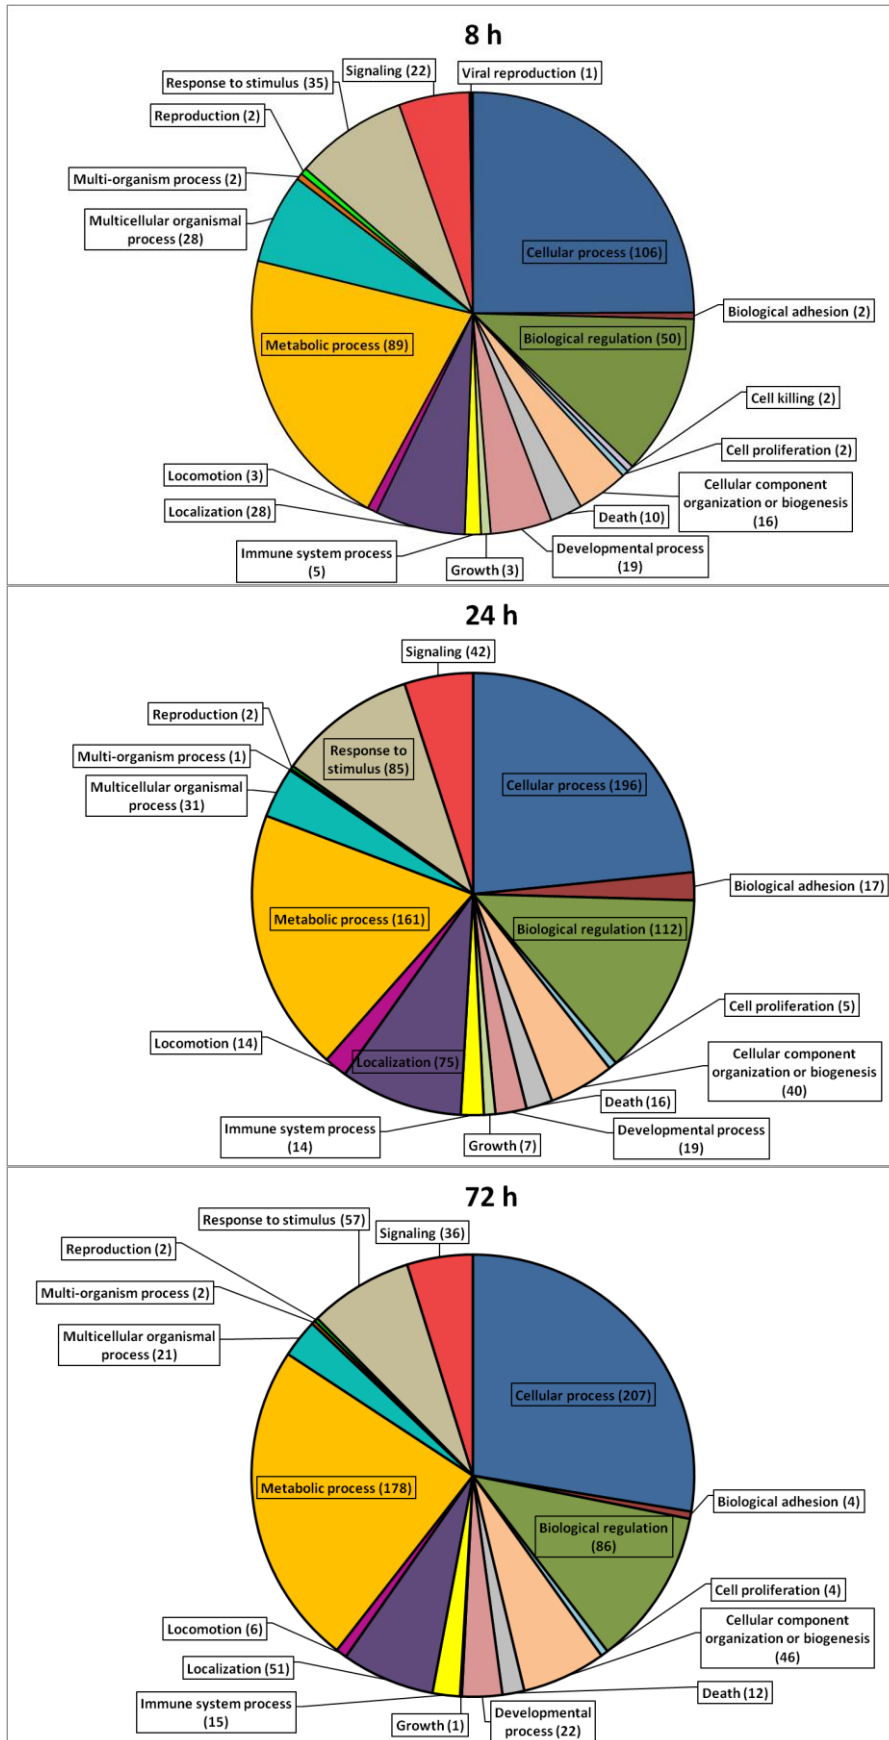

# pMCV 1.4-G860

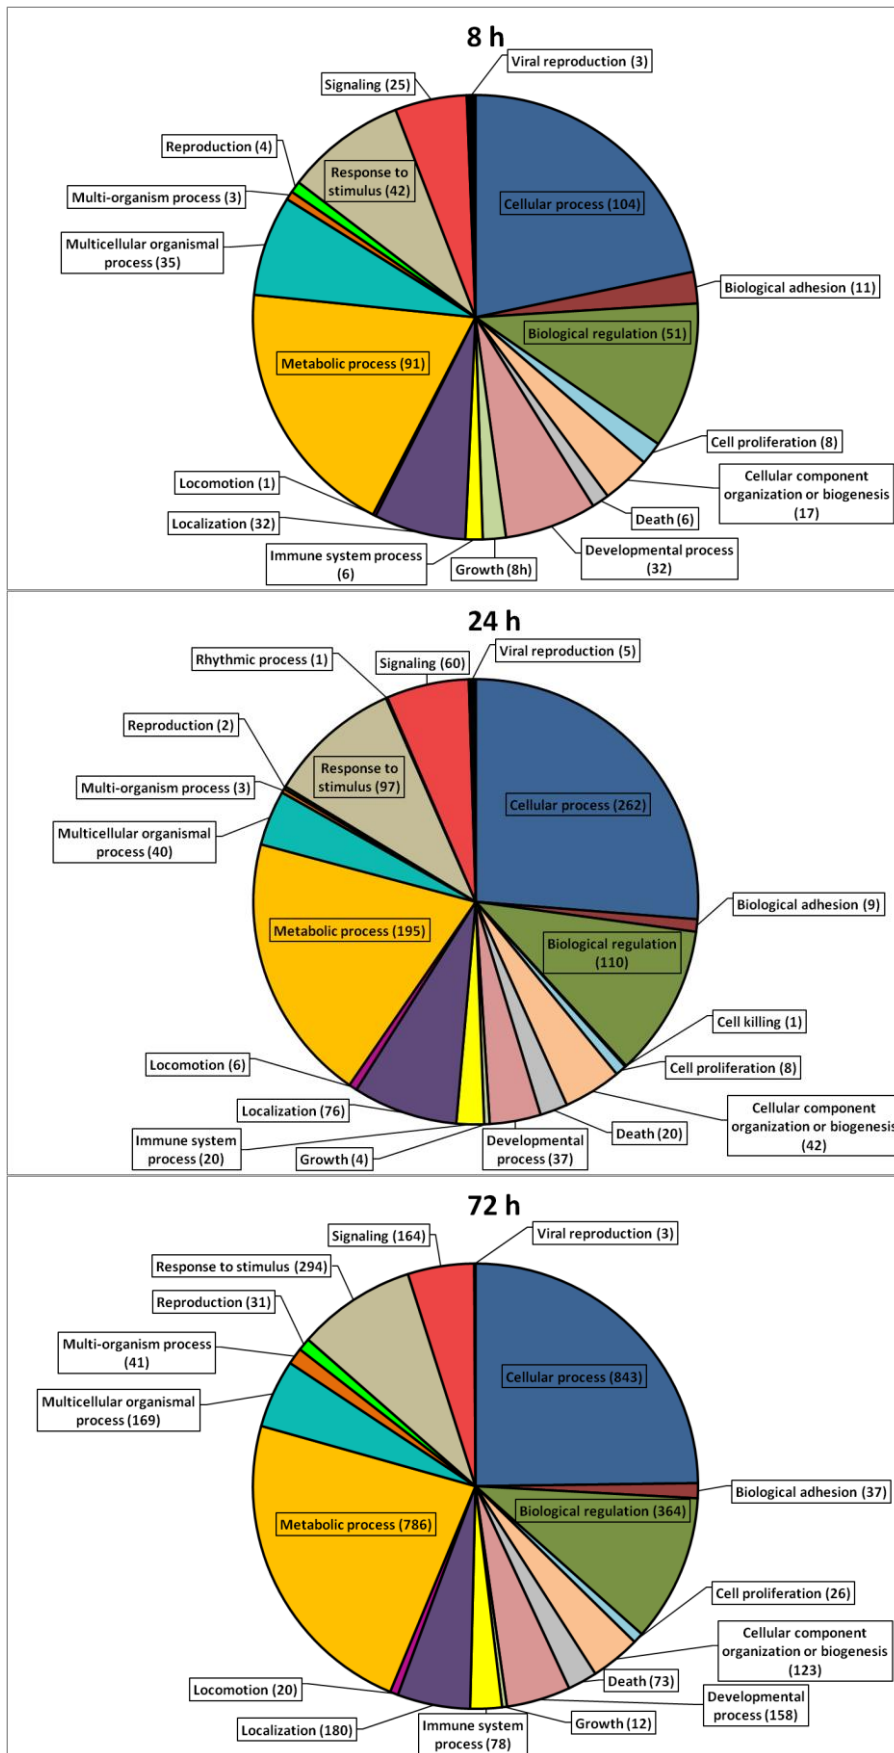

Supplement: pone.0104509.s001.pdf [file pone.0104509.s001.pdf]
