# Supplementary material for: Transcriptome Profiles Associated to VHSV Infection or DNA Vaccination in Turbot (Scophthalmus maximus)
Source: PubMed Central journal article supplement (PMC4123995; doi:10.1371/journal.pone.0104509), 2014-08-06

# Exclusive regulated sequences at 72 h after pMCV 1.4-G<sub>860</sub> immunisation

## Up-regulated

Sequence distribution: biological\_process(Filtered by #Seqs: cutoff=6.0)

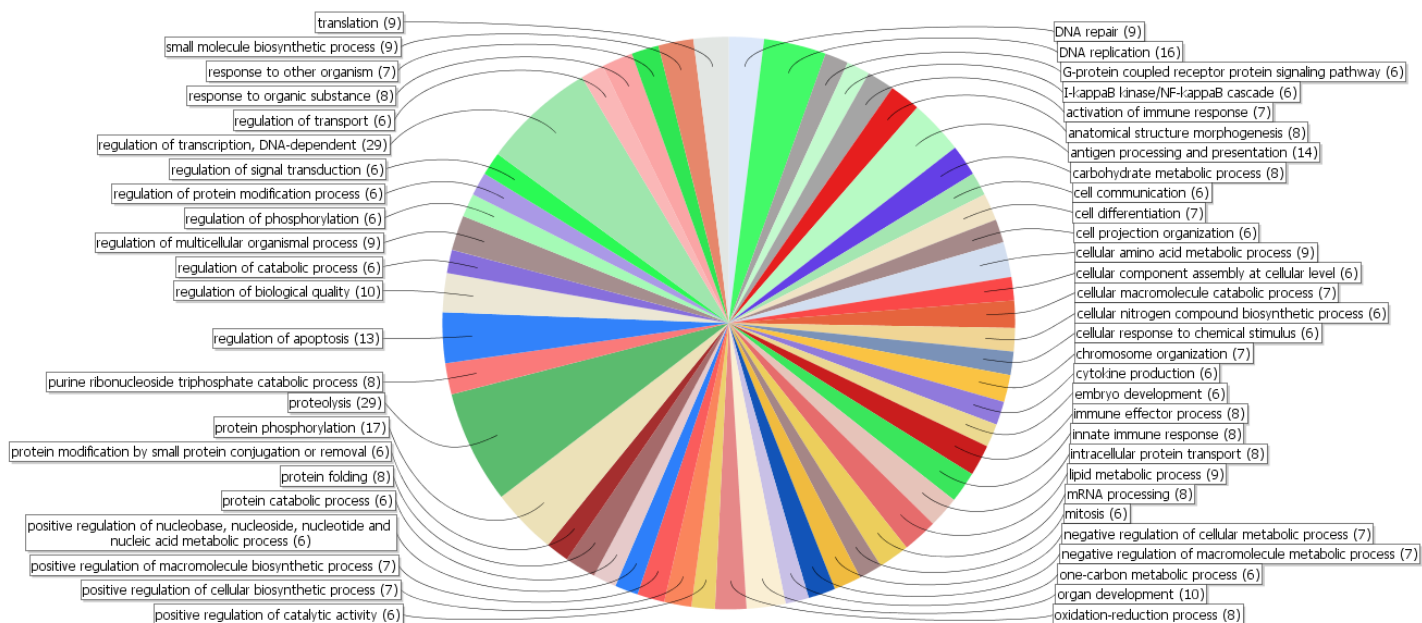

## Down-regulated

Sequence distribution: biological\_process(Filtered by #Seqs: cutoff=6.0)

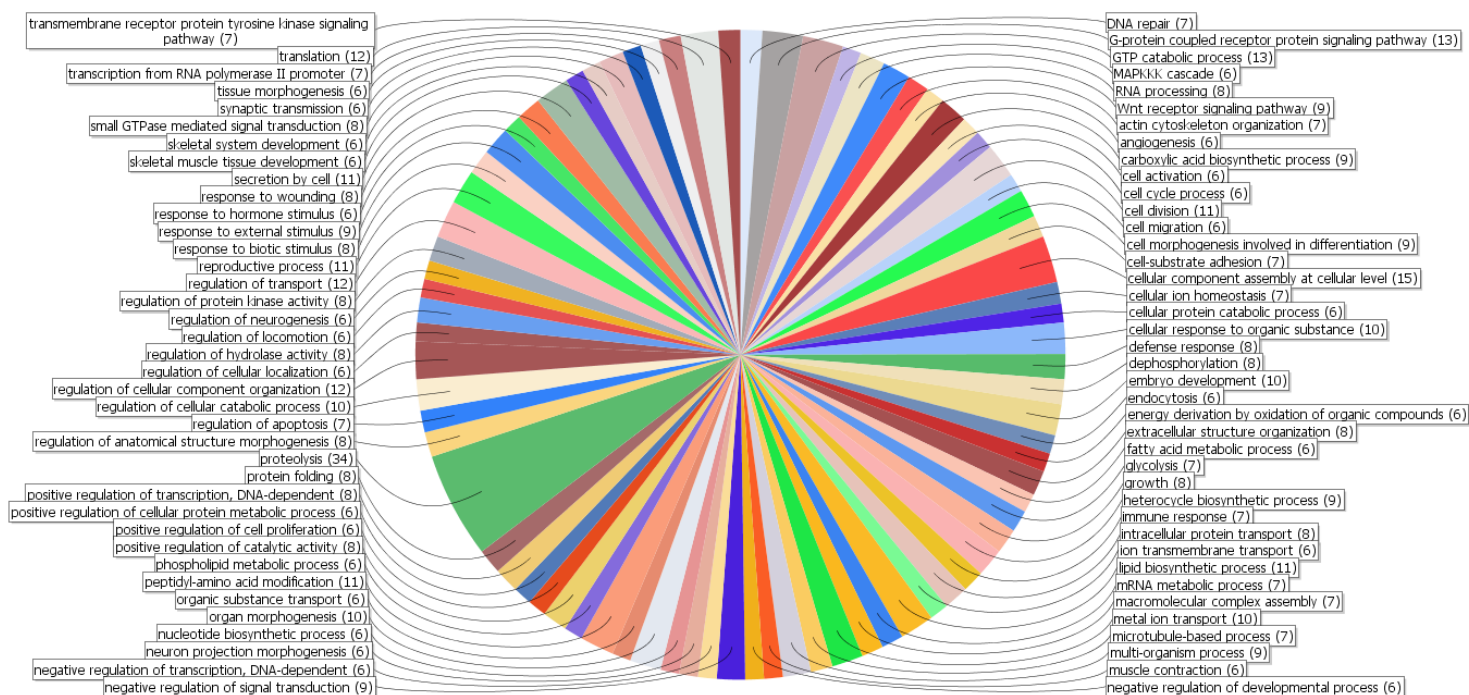

# Exclusive regulated sequences at 72 h after pMCV 1.4 immunisation

## Up-regulated

Sequence distribution: biological\_process(Filtered by #Seqs: cutoff=6.0)

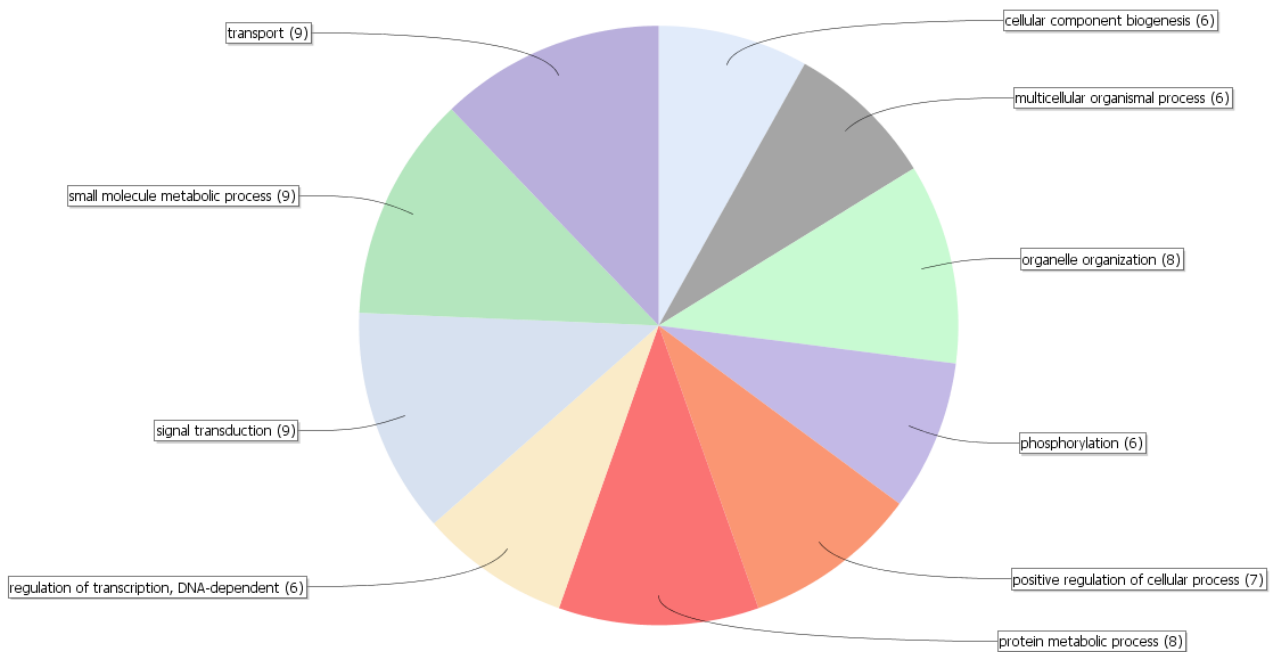

## Down-regulated

Sequence distribution: biological\_process(Filtered by #Seqs: cutoff=6.0)

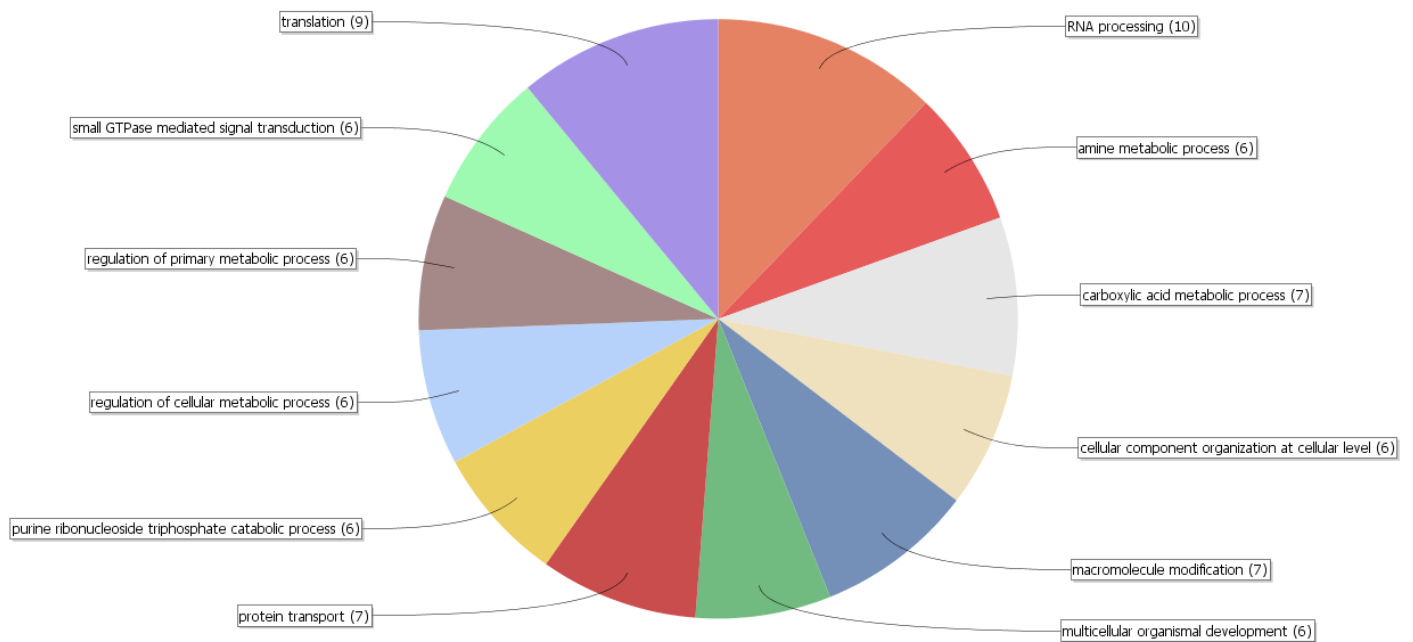

# Common regulated sequences at 72 h after pMCV 1.4 or pMCV 1.4-G<sub>860</sub> immunisation

## Up-regulated

Sequence distribution: biological\_process(Filtered by #Seqs: cutoff=6.0)

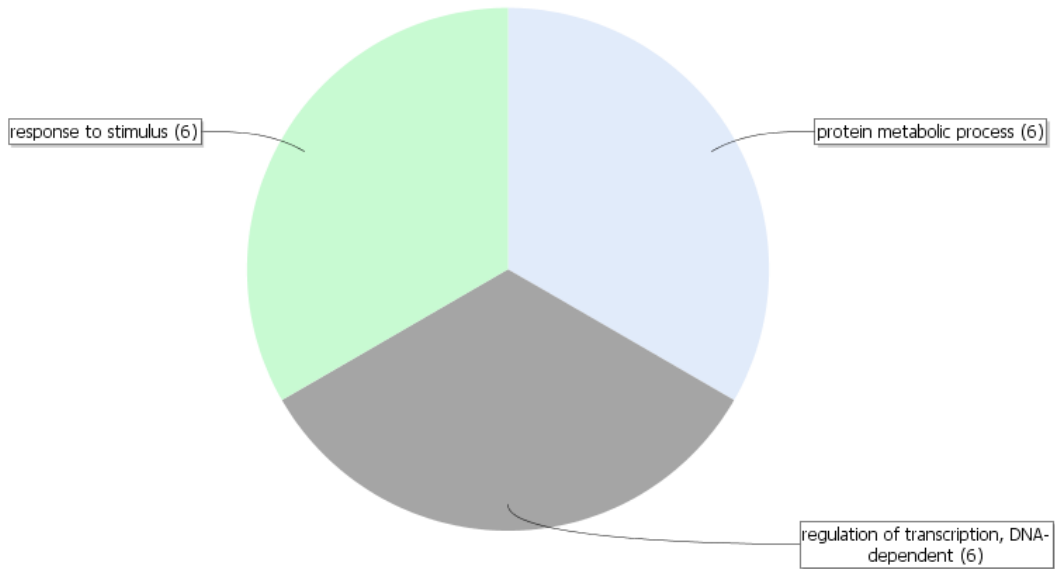

## Down-regulated

Sequence distribution: biological\_process(Filtered by #Seqs: cutoff=6.0)

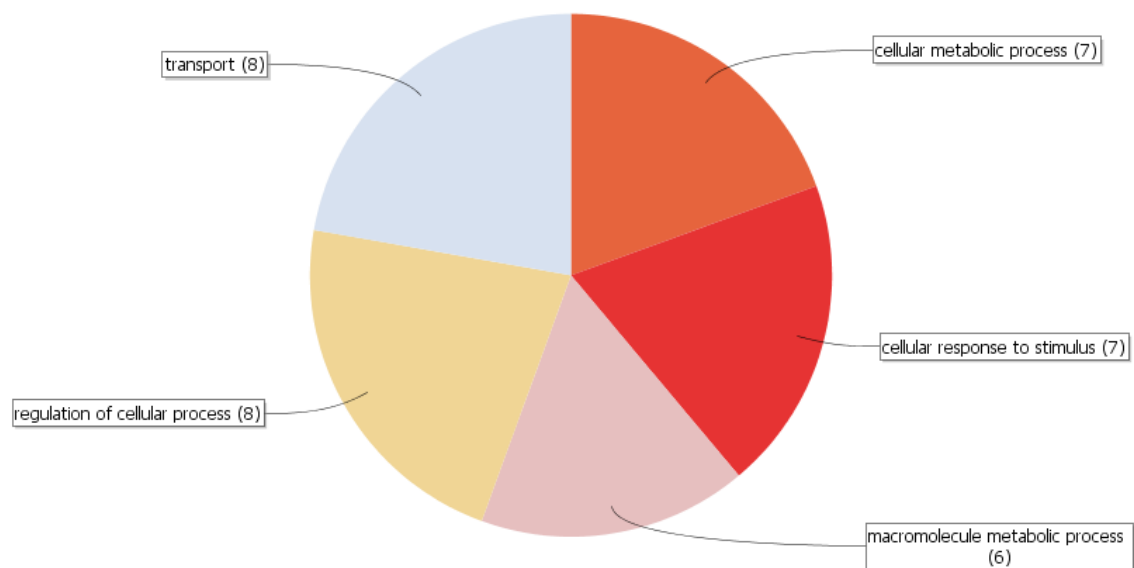

Supplement: pone.0104509.s003.pdf [file pone.0104509.s003.pdf]
