# Supplementary material for: Transcriptome Profiles Associated to VHSV Infection or DNA Vaccination in Turbot (Scophthalmus maximus)
Source: PubMed Central journal article supplement (PMC4123995; doi:10.1371/journal.pone.0104509), 2014-08-06

# PBS - VHSV

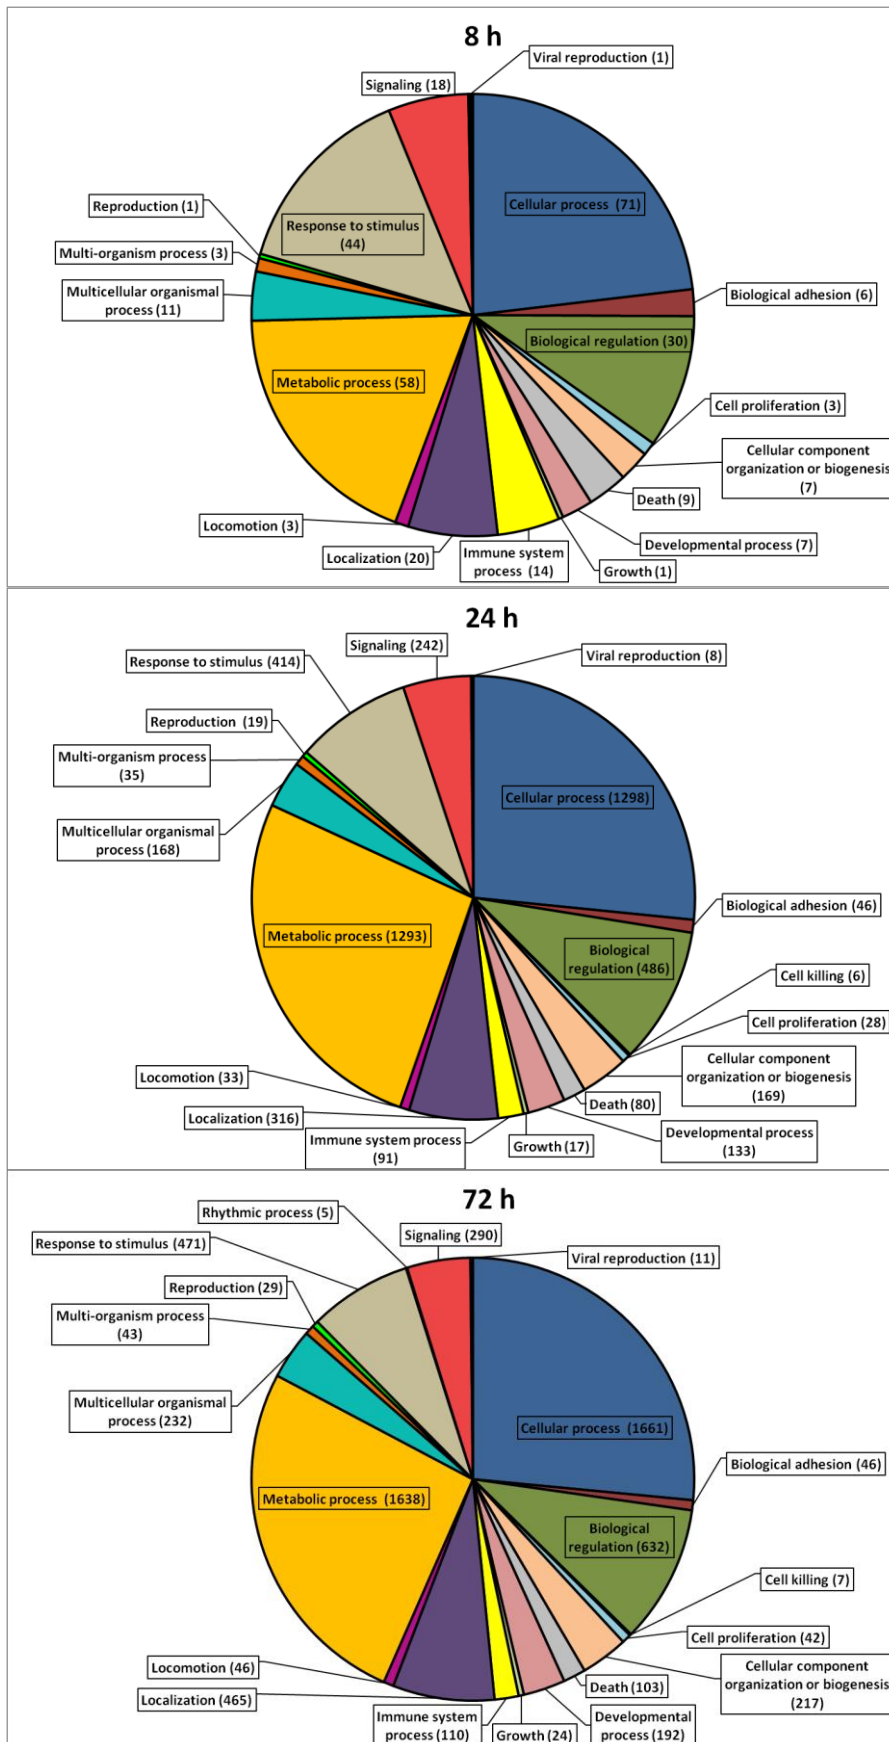

# pMCV 1.4 - VHSV

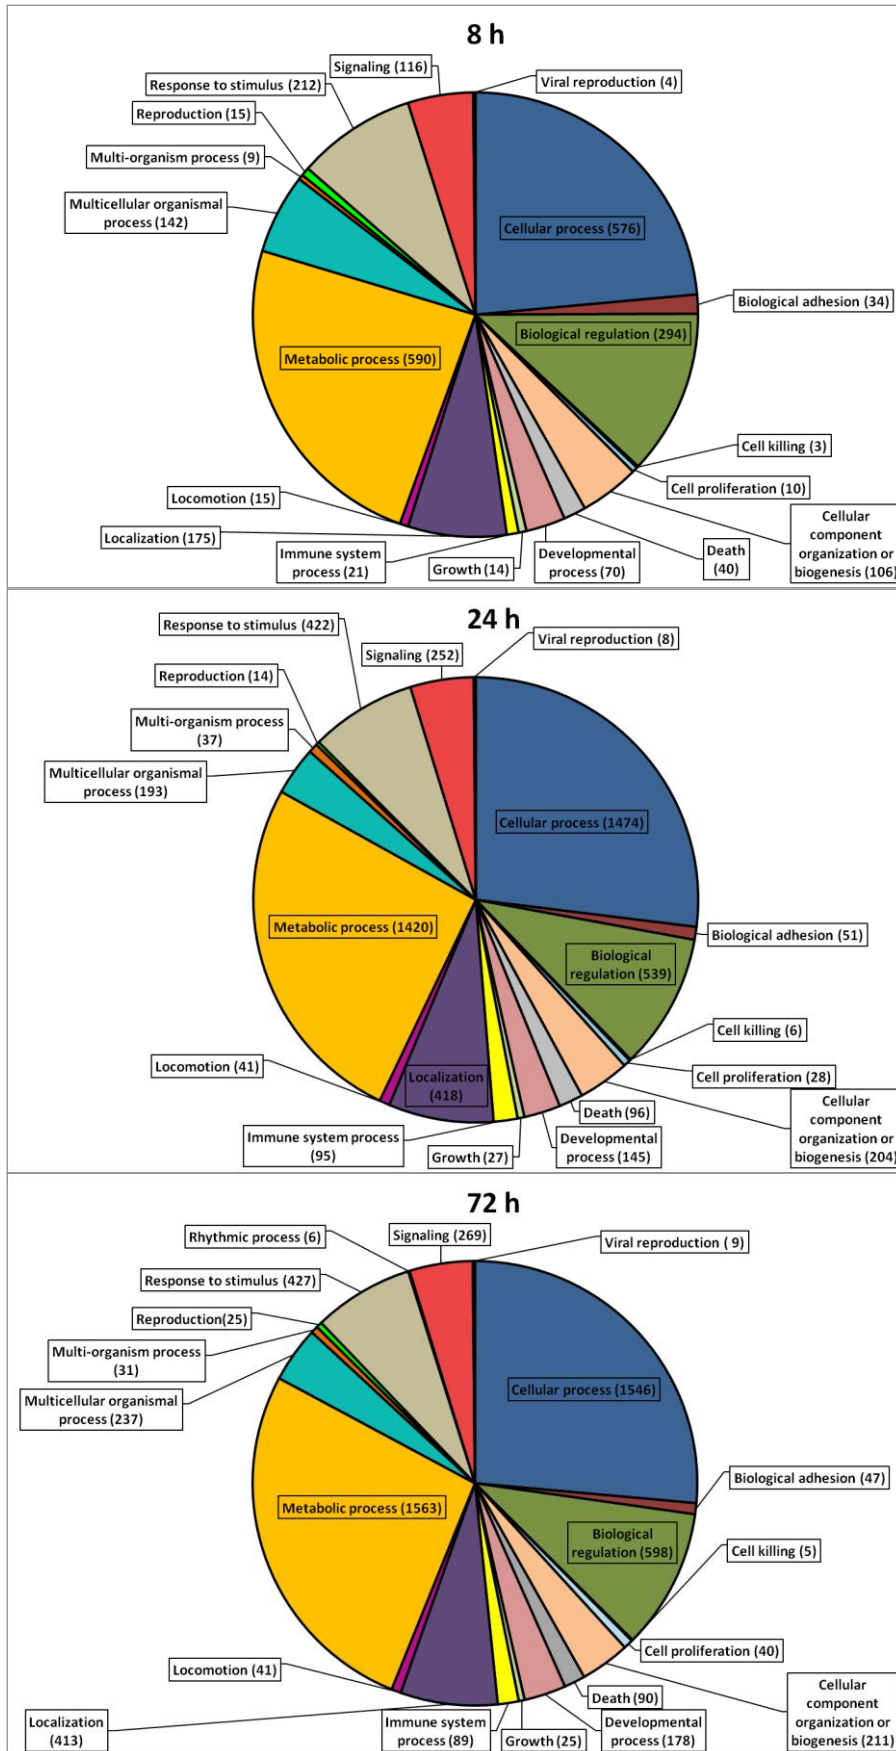

# pMCMV 1.4-G860 - VHSV

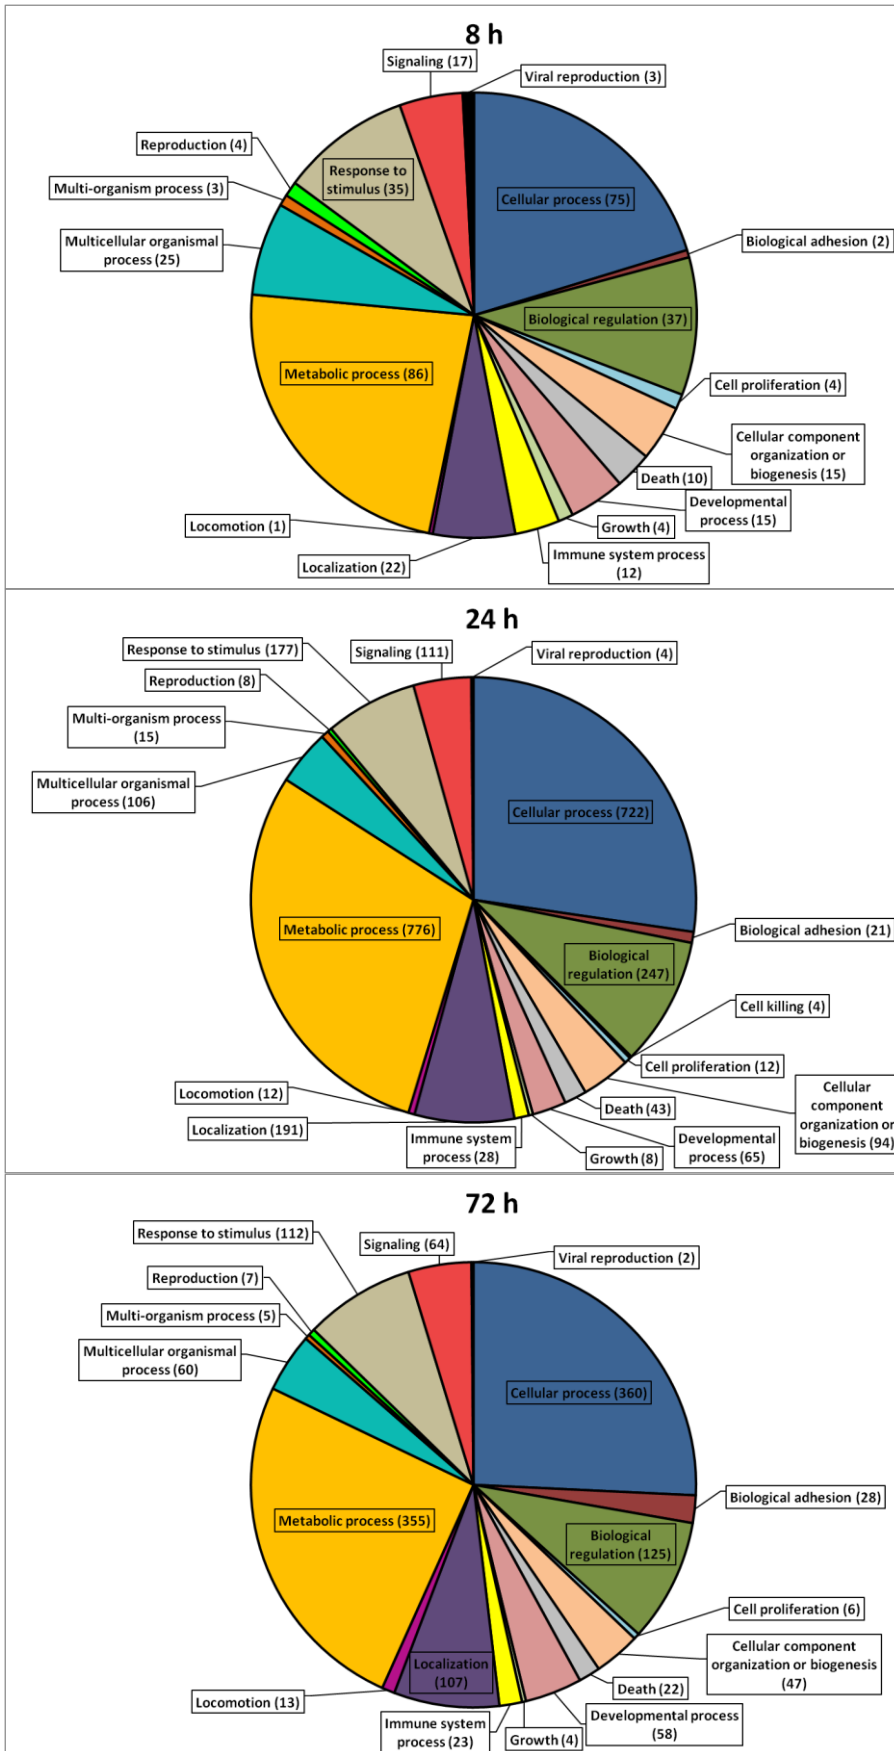

Supplement: pone.0104509.s004.pdf [file pone.0104509.s004.pdf]
