# Supplementary material for: Transcriptome Profiles Associated to VHSV Infection or DNA Vaccination in Turbot (Scophthalmus maximus)
Source: PubMed Central journal article supplement (PMC4123995; doi:10.1371/journal.pone.0104509), 2014-08-06

**UP-REGULATED GENES**

**DOWN-REGULATED GENES**

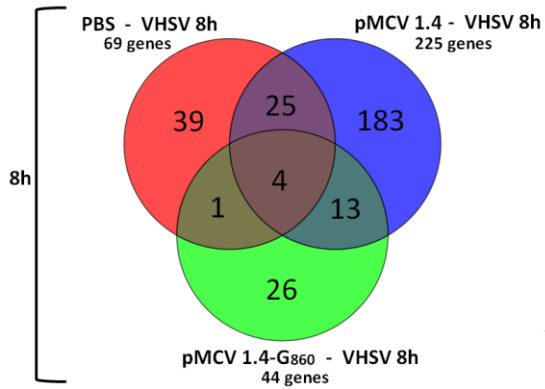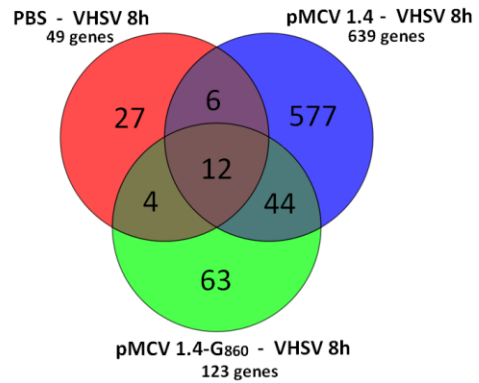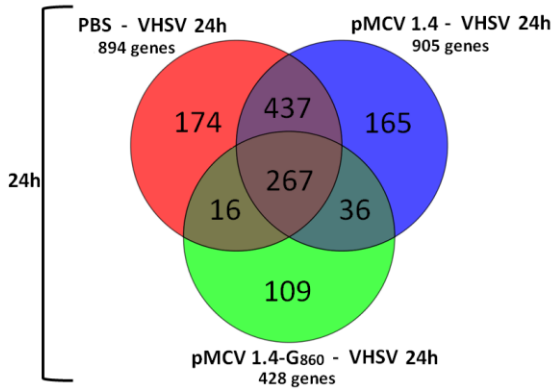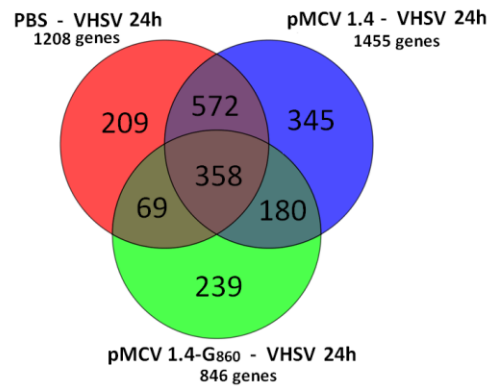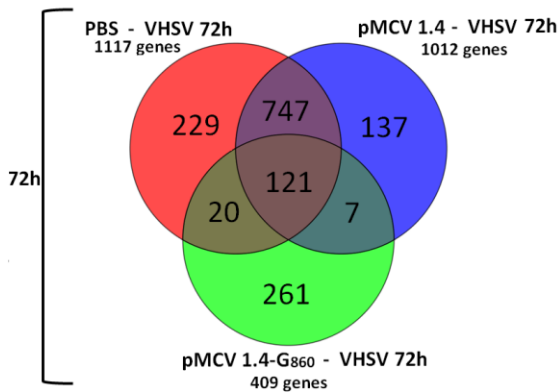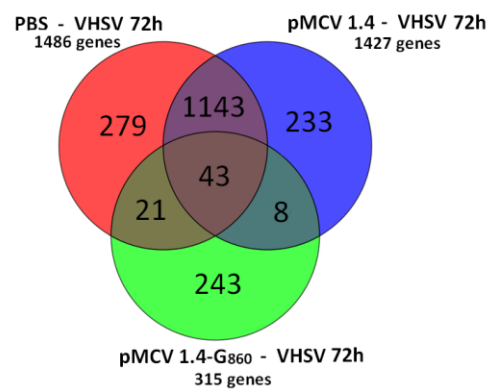

Supplement: pone.0104509.s005.pdf [file pone.0104509.s005.pdf]
